# Supplementary material
Source: PubMed Central journal article supplement (PMC2667051)
Supplement: 0810738106_0810738106SI.pdf [file 0810738106_0810738106SI.pdf]

# Supporting Information

Yakovchuk et al. 10.1073/pnas.0810738106

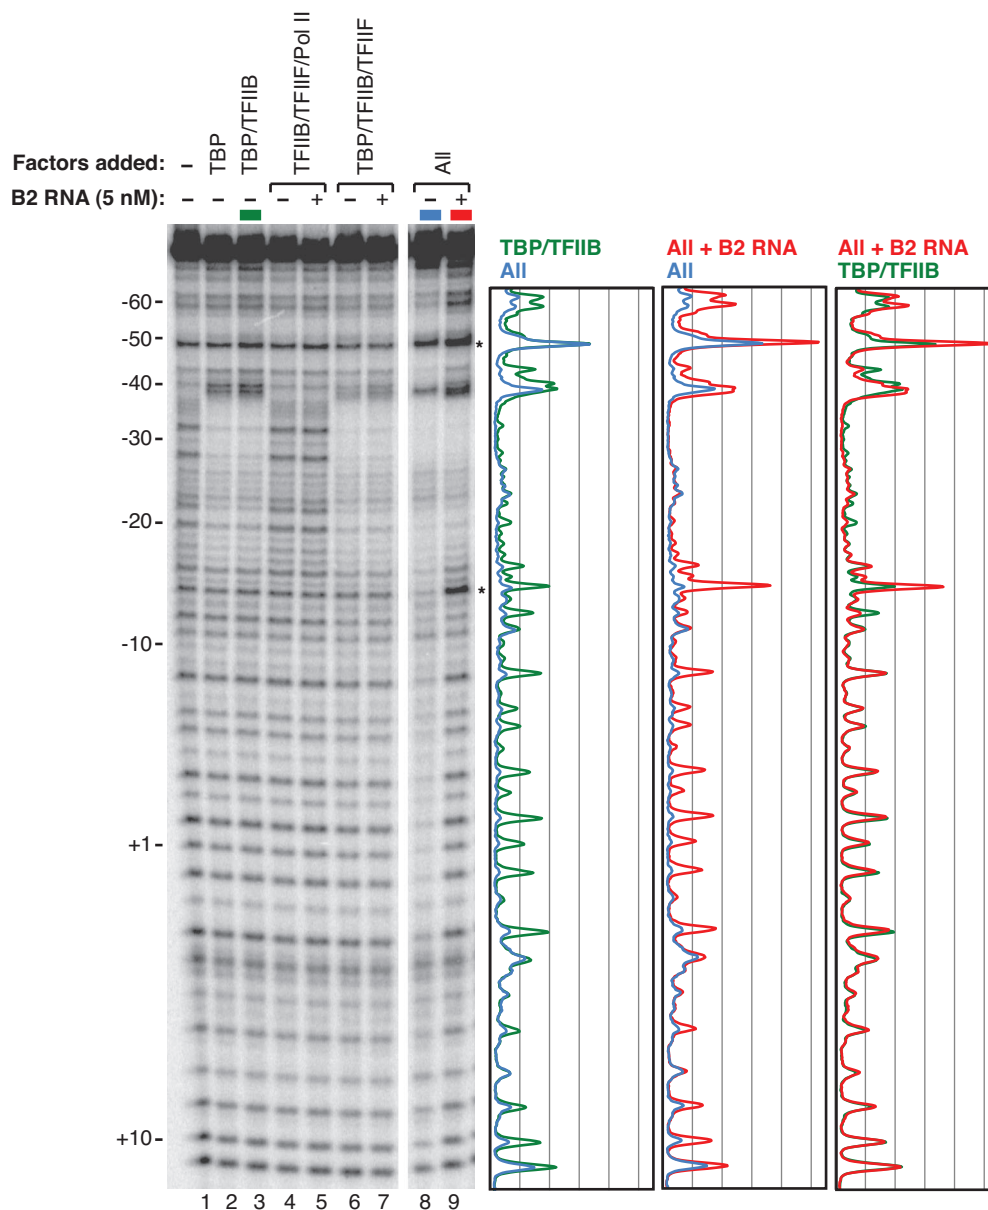

**Fig. S1.** Plots depicting the changes that occurred in DNase I protection as different combinations of factors were added to the AdMLP in the presence or absence of B2 RNA. The data are the same as shown in Fig. 4. The bands in the lanes with colored bars at the top were quantitated, and band intensity was plotted versus position along the DNA, as indicated above each plot. The color of each line in the plots corresponds to the color of the bar over the lane of the gel that was quantitated. The plots are placed next to the gel such that the peaks horizontally align with the bands from which they were derived. The left plot compares the TBP/TFIIB footprint (green line, lane 3) to that obtained in the presence of all four factors (blue line, lane 8). The middle plot compares closed complexes (blue line, lane 8) with complexes assembled in the presence of B2 RNA (red line, lane 9). The right plot compares the TBP/TFIIB footprint (green line, lane 3) to that obtained when complexes containing all factors were assembled in the presence of B2 RNA (red line, lane 9).
